# Supplementary material for: Polish adaptation and validation of the hip disability and osteoarthritis outcome score (HOOS) in osteoarthritis patients undergoing total hip replacement
Source: Springer Nature journal article supplement (doi:10.1186/s12955-020-01390-4), 2020-05-12
Supplement: MOESM1 [file 17976126]

## HOOS

### ANKIETA DLA CHORYCH Z DOLEGLIWOŚCIAMI STAWU BIODROWEGO

Dzisiejsza data.....

Data urodzenia.....

Imię i nazwisko.....

**INSTRUKCJA:** Niniejszy kwestionariusz dotyczy Twojej własnej oceny stanu biodra. Informacja ta pomoże nam zrozumieć, jakim problemem jest dla Ciebie chore biodro i jak sprawnie możesz podołać czynnościom dnia codziennego.

Odpowiedz na każde pytanie, stawiając krzyżyk w odpowiedniej **i tylko jednej** kratce dla każdego pytania. Jeśli nie jesteś pewny/pewna jak odpowiedzieć, zaznacz tę możliwość, która wyda Ci się najbliższa prawdy.

#### Objawy

Odpowiedz na poniższe pytania, biorąc pod uwagę objawy, które wystąpiły w czasie **ostatniego tygodnia**.

S1 Czy czujesz chrzęszczenie/tarcie, słyszysz "strzelanie" lub jakikolwiek inny dźwięk w stawie biodrowym?

nigdy                      rzadko                      czasami                      często                      zawsze  
                                                                                       

S2 Czy masz trudności, kiedy chcesz stanąć w szerokim rozkroku?

żadnych                      lekkie                      średnie                      duże                      bardzo duże  
                                                                                       

S3 Czy masz trudności, kiedy podczas marszu chcesz wydłużyć krok?

żadnych                      lekkie                      średnie                      duże                      bardzo duże  
                                                                                       

#### Sztywność

Poniższe pytania dotyczą stopnia sztywności stawu biodrowego, którą zaobserwowałeś w ciągu **ostatniego tygodnia**. Sztywność jest uczuciem ograniczenia lub zmniejszenia swobody ruchu w stawie biodrowym.

S4 Jak duża jest sztywność Twojego biodra tuż po pierwszym wstaniu z łóżka?

nie ma                      łagodna                      średnia                      duża                      bardzo duża  
                                                                                       

S5 Jak duża jest sztywność Twojego biodra po siedzeniu, leżeniu bądź odpoczynku **w ciągu dnia**?

nie ma                      łagodna                      średnia                      duża                      bardzo duża  
                                                                                       

#### Ból

P1 Jak często odczuwasz ból biodra?

nigdy                      raz w miesiącu                      raz w tygodniu                      każdego dnia                      cały czas  
                                                                                       

Jak silny ból stawu biodrowego odczuwałeś/-aś w ciągu **ostatniego tygodnia** podczas wykonywania poniższych czynności?

P2 pełny wyprost biodra (uniesienie nogi do góry w leżeniu na brzuchu)

|                          |                          |                          |                          |                          |
|--------------------------|--------------------------|--------------------------|--------------------------|--------------------------|
| żadnego                  | lekki                    | średni                   | duży                     | nie do wytrzymania       |
| <input type="checkbox"/> | <input type="checkbox"/> | <input type="checkbox"/> | <input type="checkbox"/> | <input type="checkbox"/> |

P3 pełne zgięcie biodra (podciągnięcie kolan do klatki piersiowej w leżeniu na plecach)

|                          |                          |                          |                          |                          |
|--------------------------|--------------------------|--------------------------|--------------------------|--------------------------|
| żadnego                  | lekki                    | średni                   | duży                     | nie do wytrzymania       |
| <input type="checkbox"/> | <input type="checkbox"/> | <input type="checkbox"/> | <input type="checkbox"/> | <input type="checkbox"/> |

P4 chodzenie po płaskim podłożu

|                          |                          |                          |                          |                          |
|--------------------------|--------------------------|--------------------------|--------------------------|--------------------------|
| żadnego                  | lekki                    | średni                   | duży                     | nie do wytrzymania       |
| <input type="checkbox"/> | <input type="checkbox"/> | <input type="checkbox"/> | <input type="checkbox"/> | <input type="checkbox"/> |

P5 chodzenie po schodach

|                          |                          |                          |                          |                          |
|--------------------------|--------------------------|--------------------------|--------------------------|--------------------------|
| żadnego                  | lekki                    | średni                   | duży                     | nie do wytrzymania       |
| <input type="checkbox"/> | <input type="checkbox"/> | <input type="checkbox"/> | <input type="checkbox"/> | <input type="checkbox"/> |

P6 leżenie w łóżku w nocy (ból, który przeszkadza we śnie)

|                          |                          |                          |                          |                          |
|--------------------------|--------------------------|--------------------------|--------------------------|--------------------------|
| żadnego                  | lekki                    | średni                   | duży                     | nie do wytrzymania       |
| <input type="checkbox"/> | <input type="checkbox"/> | <input type="checkbox"/> | <input type="checkbox"/> | <input type="checkbox"/> |

P7 siedzenie lub leżenie

|                          |                          |                          |                          |                          |
|--------------------------|--------------------------|--------------------------|--------------------------|--------------------------|
| żadnego                  | lekki                    | średni                   | duży                     | nie do wytrzymania       |
| <input type="checkbox"/> | <input type="checkbox"/> | <input type="checkbox"/> | <input type="checkbox"/> | <input type="checkbox"/> |

P8 stanie w pozycji wyprostowanej

|                          |                          |                          |                          |                          |
|--------------------------|--------------------------|--------------------------|--------------------------|--------------------------|
| żadnego                  | lekki                    | średni                   | duży                     | nie do wytrzymania       |
| <input type="checkbox"/> | <input type="checkbox"/> | <input type="checkbox"/> | <input type="checkbox"/> | <input type="checkbox"/> |

P9 chodzenie po twardym podłożu (np. asfalt, beton)

|                          |                          |                          |                          |                          |
|--------------------------|--------------------------|--------------------------|--------------------------|--------------------------|
| żadnego                  | lekki                    | średni                   | duży                     | nie do wytrzymania       |
| <input type="checkbox"/> | <input type="checkbox"/> | <input type="checkbox"/> | <input type="checkbox"/> | <input type="checkbox"/> |

P10 chodzenie po nierównym podłożu

|                          |                          |                          |                          |                          |
|--------------------------|--------------------------|--------------------------|--------------------------|--------------------------|
| żadnego                  | lekki                    | średni                   | duży                     | nie do wytrzymania       |
| <input type="checkbox"/> | <input type="checkbox"/> | <input type="checkbox"/> | <input type="checkbox"/> | <input type="checkbox"/> |

### **Czynności życia codziennego**

Następne pytania dotyczą normalnej aktywności fizycznej. Chcemy ocenić Twoją zdolność do przemieszczania się i wykonywania codziennych czynności. Dla każdej wymienionej czynności określ stopień trudności, jaki napotykasz przy jej wykonywaniu z uwagi na Twoje biodro.

A1 schodzenie ze schodów

|                          |                          |                          |                          |                          |
|--------------------------|--------------------------|--------------------------|--------------------------|--------------------------|
| żaden                    | lekki                    | średni                   | duży                     | bardzo duży              |
| <input type="checkbox"/> | <input type="checkbox"/> | <input type="checkbox"/> | <input type="checkbox"/> | <input type="checkbox"/> |

A2 wchodzenie po schodach

|                          |                          |                          |                          |                          |
|--------------------------|--------------------------|--------------------------|--------------------------|--------------------------|
| żaden                    | lekki                    | średni                   | duży                     | bardzo duży              |
| <input type="checkbox"/> | <input type="checkbox"/> | <input type="checkbox"/> | <input type="checkbox"/> | <input type="checkbox"/> |

A3 wstanie z pozycji siedzącej

|                          |                          |                          |                          |                          |
|--------------------------|--------------------------|--------------------------|--------------------------|--------------------------|
| żaden                    | lekki                    | średni                   | duży                     | bardzo duży              |
| <input type="checkbox"/> | <input type="checkbox"/> | <input type="checkbox"/> | <input type="checkbox"/> | <input type="checkbox"/> |

Dla wymienionych niżej czynności wskaż stopień trudności, który odczuwałeś/-aś w związku ze swoim biodrem w ciągu **ostatniego tygodnia**.

A4 stanie

|                          |                          |                          |                          |                          |
|--------------------------|--------------------------|--------------------------|--------------------------|--------------------------|
| żaden                    | lekki                    | średni                   | duży                     | bardzo duży              |
| <input type="checkbox"/> | <input type="checkbox"/> | <input type="checkbox"/> | <input type="checkbox"/> | <input type="checkbox"/> |

A5 skłon do podłogi/podniesienie przedmiotu z podłogi

|                          |                          |                          |                          |                          |
|--------------------------|--------------------------|--------------------------|--------------------------|--------------------------|
| żaden                    | lekki                    | średni                   | duży                     | bardzo duży              |
| <input type="checkbox"/> | <input type="checkbox"/> | <input type="checkbox"/> | <input type="checkbox"/> | <input type="checkbox"/> |

A6 chodzenie po płaskim podłożu

|                          |                          |                          |                          |                          |
|--------------------------|--------------------------|--------------------------|--------------------------|--------------------------|
| żaden                    | lekki                    | średni                   | duży                     | bardzo duży              |
| <input type="checkbox"/> | <input type="checkbox"/> | <input type="checkbox"/> | <input type="checkbox"/> | <input type="checkbox"/> |

A7 wsiadanie i wysiadanie z samochodu

|                          |                          |                          |                          |                          |
|--------------------------|--------------------------|--------------------------|--------------------------|--------------------------|
| żaden                    | lekki                    | średni                   | duży                     | bardzo duży              |
| <input type="checkbox"/> | <input type="checkbox"/> | <input type="checkbox"/> | <input type="checkbox"/> | <input type="checkbox"/> |

A8 robienie zakupów

|                          |                          |                          |                          |                          |
|--------------------------|--------------------------|--------------------------|--------------------------|--------------------------|
| żaden                    | lekki                    | średni                   | duży                     | bardzo duży              |
| <input type="checkbox"/> | <input type="checkbox"/> | <input type="checkbox"/> | <input type="checkbox"/> | <input type="checkbox"/> |

A9 wkładanie skarpet/pończoch/rajstop

|                          |                          |                          |                          |                          |
|--------------------------|--------------------------|--------------------------|--------------------------|--------------------------|
| żaden                    | lekki                    | średni                   | duży                     | bardzo duży              |
| <input type="checkbox"/> | <input type="checkbox"/> | <input type="checkbox"/> | <input type="checkbox"/> | <input type="checkbox"/> |

A10 wstawanie z łóżka

|                          |                          |                          |                          |                          |
|--------------------------|--------------------------|--------------------------|--------------------------|--------------------------|
| żaden                    | lekki                    | średni                   | duży                     | bardzo duży              |
| <input type="checkbox"/> | <input type="checkbox"/> | <input type="checkbox"/> | <input type="checkbox"/> | <input type="checkbox"/> |

A11 zdejmowanie skarpet/pończoch/rajstop

|                          |                          |                          |                          |                          |
|--------------------------|--------------------------|--------------------------|--------------------------|--------------------------|
| żaden                    | lekki                    | średni                   | duży                     | bardzo duży              |
| <input type="checkbox"/> | <input type="checkbox"/> | <input type="checkbox"/> | <input type="checkbox"/> | <input type="checkbox"/> |

A12 leżenie w łóżku (z przekręcaniem się na boki i zachowaniem tej samej pozycji biodra przez dłuższy czas)

|                          |                          |                          |                          |                          |
|--------------------------|--------------------------|--------------------------|--------------------------|--------------------------|
| żaden                    | lekki                    | średni                   | duży                     | bardzo duży              |
| <input type="checkbox"/> | <input type="checkbox"/> | <input type="checkbox"/> | <input type="checkbox"/> | <input type="checkbox"/> |

A13 wchodzenie i wychodzenie z wanny/spod prysznicza

|                          |                          |                          |                          |                          |
|--------------------------|--------------------------|--------------------------|--------------------------|--------------------------|
| żaden                    | lekki                    | średni                   | duży                     | bardzo duży              |
| <input type="checkbox"/> | <input type="checkbox"/> | <input type="checkbox"/> | <input type="checkbox"/> | <input type="checkbox"/> |

A14 siedzenie

|                          |                          |                          |                          |                          |
|--------------------------|--------------------------|--------------------------|--------------------------|--------------------------|
| żaden                    | lekki                    | średni                   | duży                     | bardzo duży              |
| <input type="checkbox"/> | <input type="checkbox"/> | <input type="checkbox"/> | <input type="checkbox"/> | <input type="checkbox"/> |

A15 siadanie na sedesie, wstawanie z sedesu

|                          |                          |                          |                          |                          |
|--------------------------|--------------------------|--------------------------|--------------------------|--------------------------|
| żaden                    | lekki                    | średni                   | duży                     | bardzo duży              |
| <input type="checkbox"/> | <input type="checkbox"/> | <input type="checkbox"/> | <input type="checkbox"/> | <input type="checkbox"/> |

Dla wymienionych niżej czynności wskaż stopień trudności, który odczuwałeś/-aś w związku ze swoim biodrem w ciągu **ostatniego tygodnia**.

A16 wykonywanie ciężkich prac domowych (przesuwanie ciężkich przedmiotów, mebli, szorowanie podłóg itp.)

|                          |                          |                          |                          |                          |
|--------------------------|--------------------------|--------------------------|--------------------------|--------------------------|
| żaden                    | lekki                    | średni                   | duży                     | bardzo duży              |
| <input type="checkbox"/> | <input type="checkbox"/> | <input type="checkbox"/> | <input type="checkbox"/> | <input type="checkbox"/> |

A17 wykonywanie lekkich prac domowych (ścieranie kurzu, gotowanie itp.)

|                          |                          |                          |                          |                          |
|--------------------------|--------------------------|--------------------------|--------------------------|--------------------------|
| żaden                    | lekki                    | średni                   | duży                     | bardzo duży              |
| <input type="checkbox"/> | <input type="checkbox"/> | <input type="checkbox"/> | <input type="checkbox"/> | <input type="checkbox"/> |

### **Aktywność sportowa i rekreacyjna**

Pytania dotyczą czynności podczas wzmożonej aktywności fizycznej. Jaka była trudność wykonania wymienionych czynności ze względu na stan Twojego biodra w ciągu **ostatniego tygodnia**?

SP1 przysiady / kucanie

|                          |                          |                          |                          |                          |
|--------------------------|--------------------------|--------------------------|--------------------------|--------------------------|
| żadna                    | lekka                    | średnia                  | duża                     | nie do wykonania         |
| <input type="checkbox"/> | <input type="checkbox"/> | <input type="checkbox"/> | <input type="checkbox"/> | <input type="checkbox"/> |

SP2 bieganie

|                          |                          |                          |                          |                          |
|--------------------------|--------------------------|--------------------------|--------------------------|--------------------------|
| żadna                    | lekka                    | średnia                  | duża                     | nie do wykonania         |
| <input type="checkbox"/> | <input type="checkbox"/> | <input type="checkbox"/> | <input type="checkbox"/> | <input type="checkbox"/> |

SP3 kręcenie i obracanie się na pięcie/stopie

|                          |                          |                          |                          |                          |
|--------------------------|--------------------------|--------------------------|--------------------------|--------------------------|
| żadna                    | lekka                    | średnia                  | duża                     | nie do wykonania         |
| <input type="checkbox"/> | <input type="checkbox"/> | <input type="checkbox"/> | <input type="checkbox"/> | <input type="checkbox"/> |

SP4 chodzenie po nierównym podłożu

|                          |                          |                          |                          |                          |
|--------------------------|--------------------------|--------------------------|--------------------------|--------------------------|
| żadna                    | lekka                    | średnia                  | duża                     | nie do wykonania         |
| <input type="checkbox"/> | <input type="checkbox"/> | <input type="checkbox"/> | <input type="checkbox"/> | <input type="checkbox"/> |

### **Jakość życia**

Q1 jak często biodro daje Ci znać o sobie?

|                          |                          |                          |                          |                          |
|--------------------------|--------------------------|--------------------------|--------------------------|--------------------------|
| nigdy                    | raz w miesiącu           | raz w tygodniu           | każdego dnia             | stale                    |
| <input type="checkbox"/> | <input type="checkbox"/> | <input type="checkbox"/> | <input type="checkbox"/> | <input type="checkbox"/> |

Q2 czy zmieniłeś/-aś swój styl życia, aby unikać potencjalnie niebezpiecznych czynności dla swojego biodra?

|                          |                          |                          |                          |                          |
|--------------------------|--------------------------|--------------------------|--------------------------|--------------------------|
| w ogóle                  | trochę                   | średnio                  | bardzo                   | całkowicie               |
| <input type="checkbox"/> | <input type="checkbox"/> | <input type="checkbox"/> | <input type="checkbox"/> | <input type="checkbox"/> |

Q3 w jakim stopniu możesz polegać na sprawności swojego biodra?

|                          |                          |                          |                          |                          |
|--------------------------|--------------------------|--------------------------|--------------------------|--------------------------|
| całkowicie               | bardzo                   | średnio                  | trochę                   | w ogóle                  |
| <input type="checkbox"/> | <input type="checkbox"/> | <input type="checkbox"/> | <input type="checkbox"/> | <input type="checkbox"/> |

Q4 Ile ogólnie kłopotu sprawia Ci biodro?

|                          |                          |                          |                          |                          |
|--------------------------|--------------------------|--------------------------|--------------------------|--------------------------|
| w ogóle                  | trochę                   | średnio                  | dużo                     | bardzo dużo              |
| <input type="checkbox"/> | <input type="checkbox"/> | <input type="checkbox"/> | <input type="checkbox"/> | <input type="checkbox"/> |

**Dziękujemy bardzo za dokładne wypełnienie ankiety**
